# Supplementary material
Source: PubMed Central journal article supplement (PMC1978075)
Supplement: 7401026-s1.pdf [file 7401026-s1.pdf]

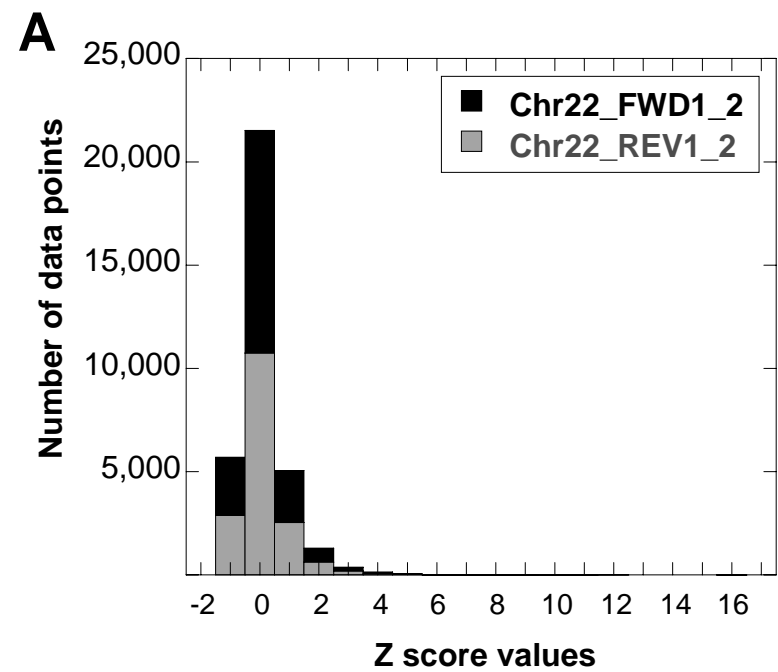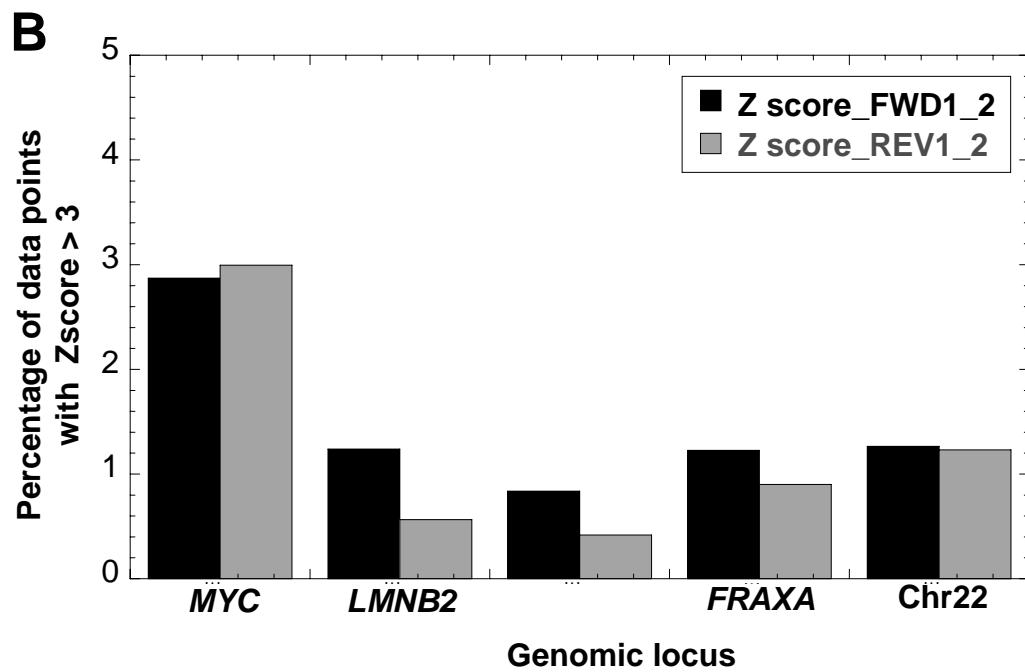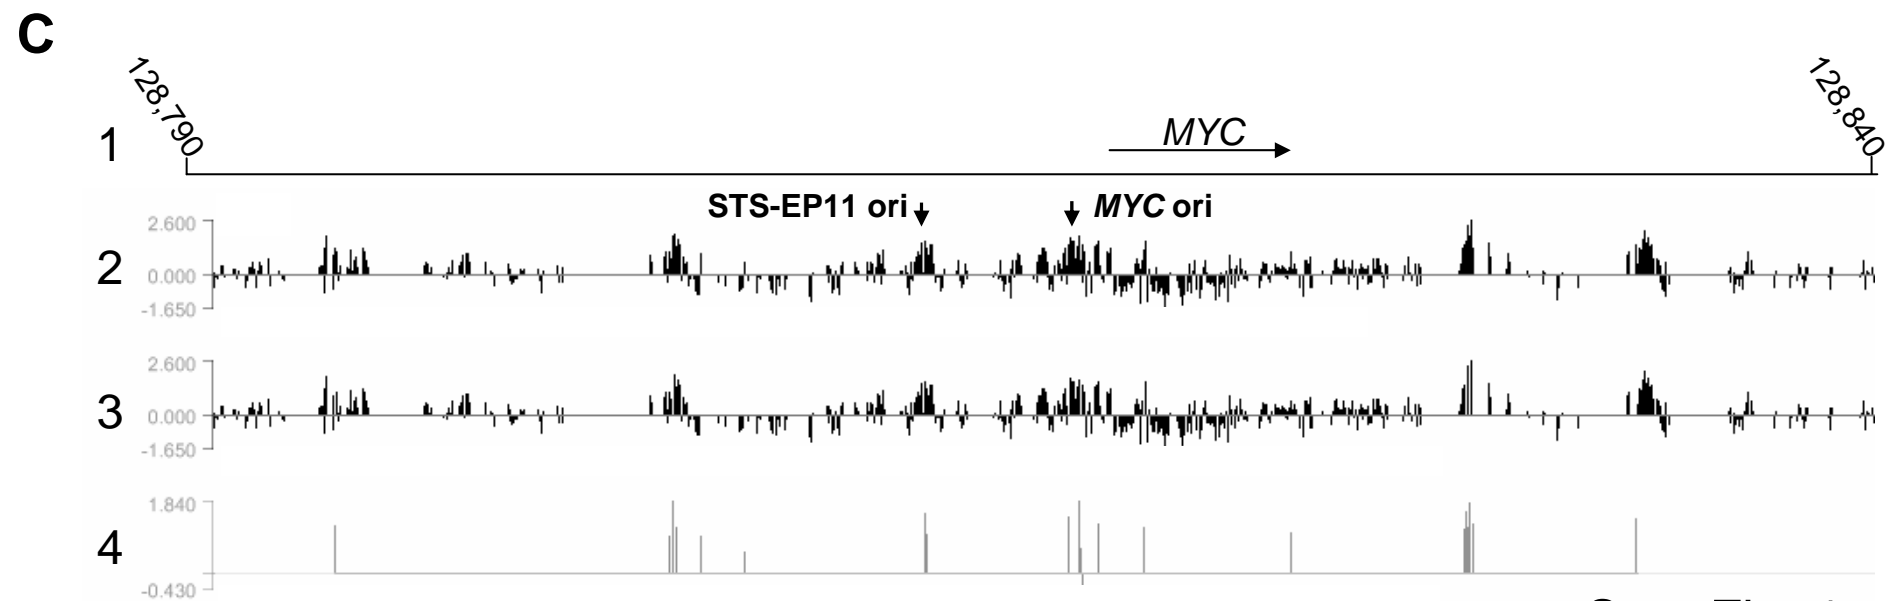

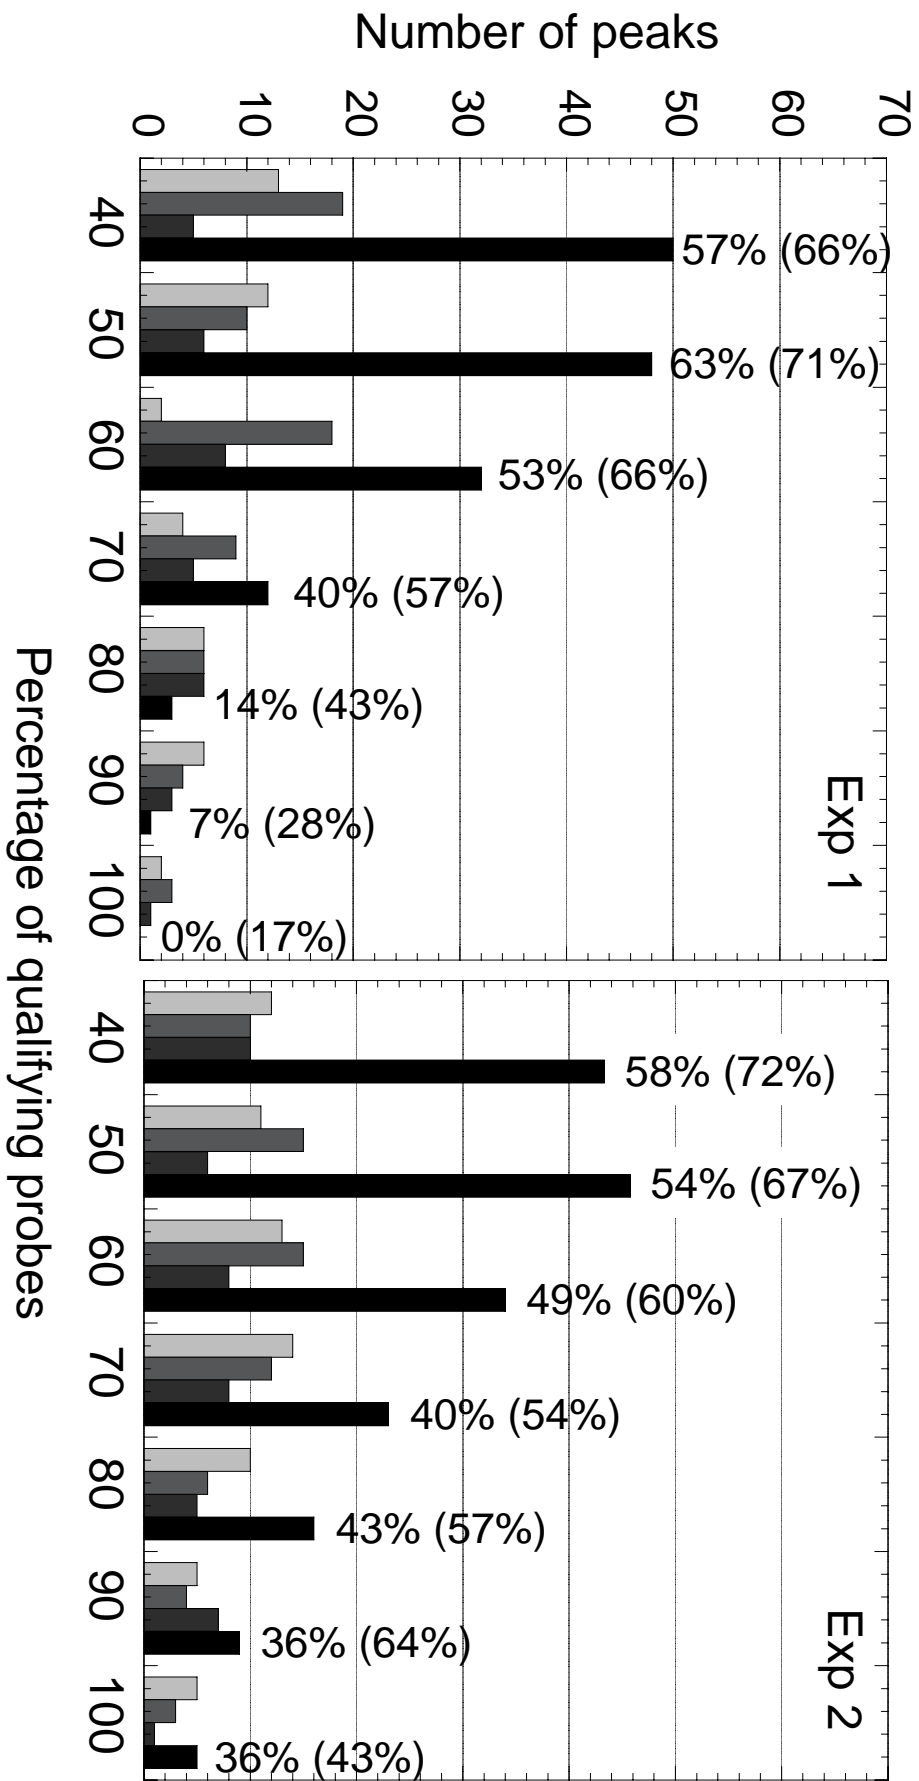

Sup. Fig.2

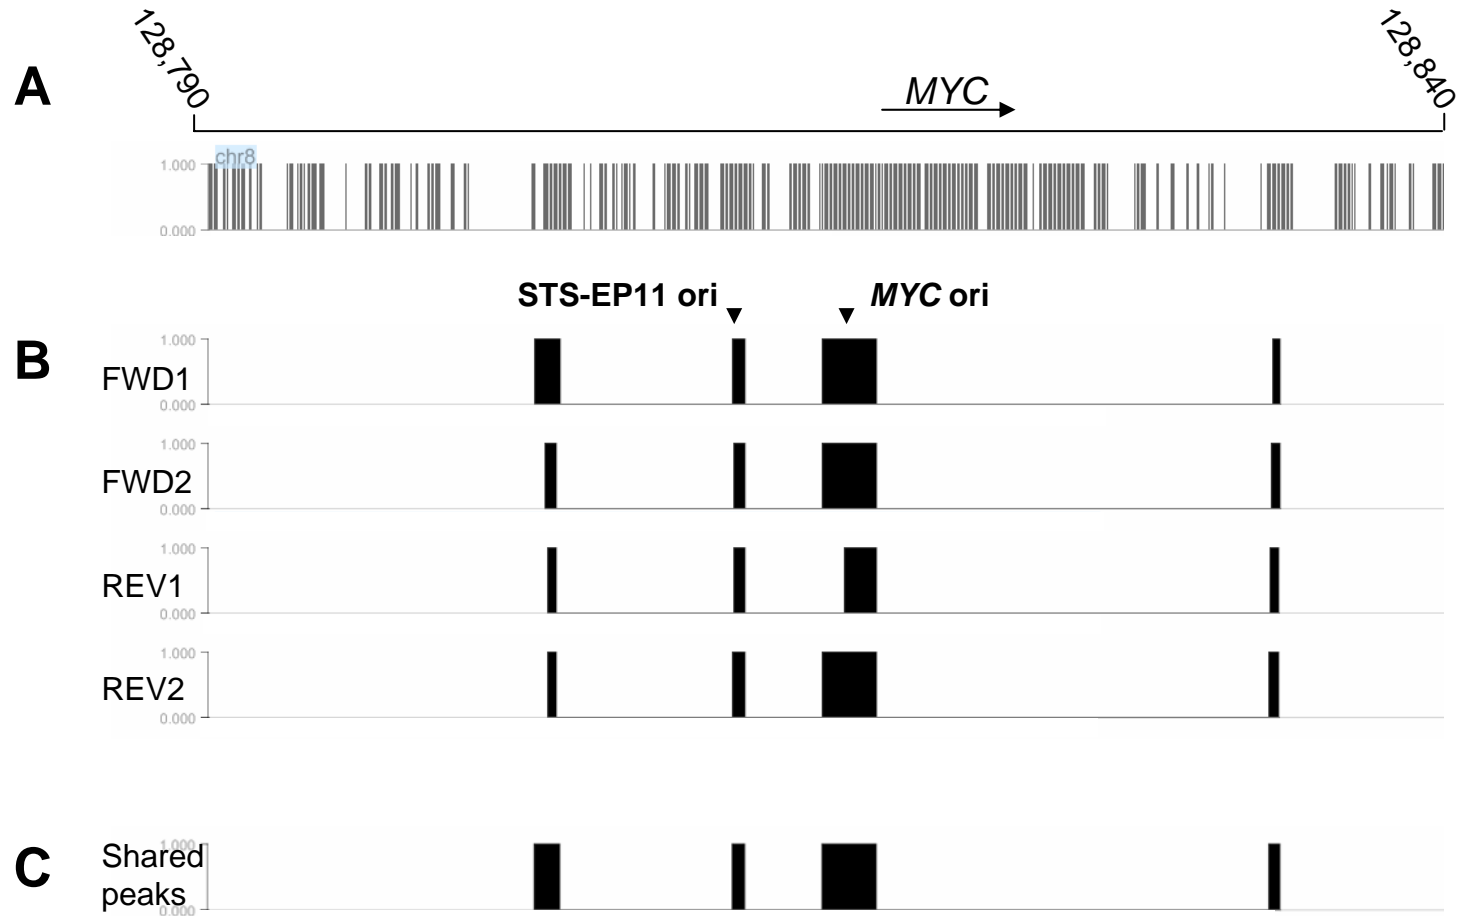

# Chr22 region

Sup. Fig.4

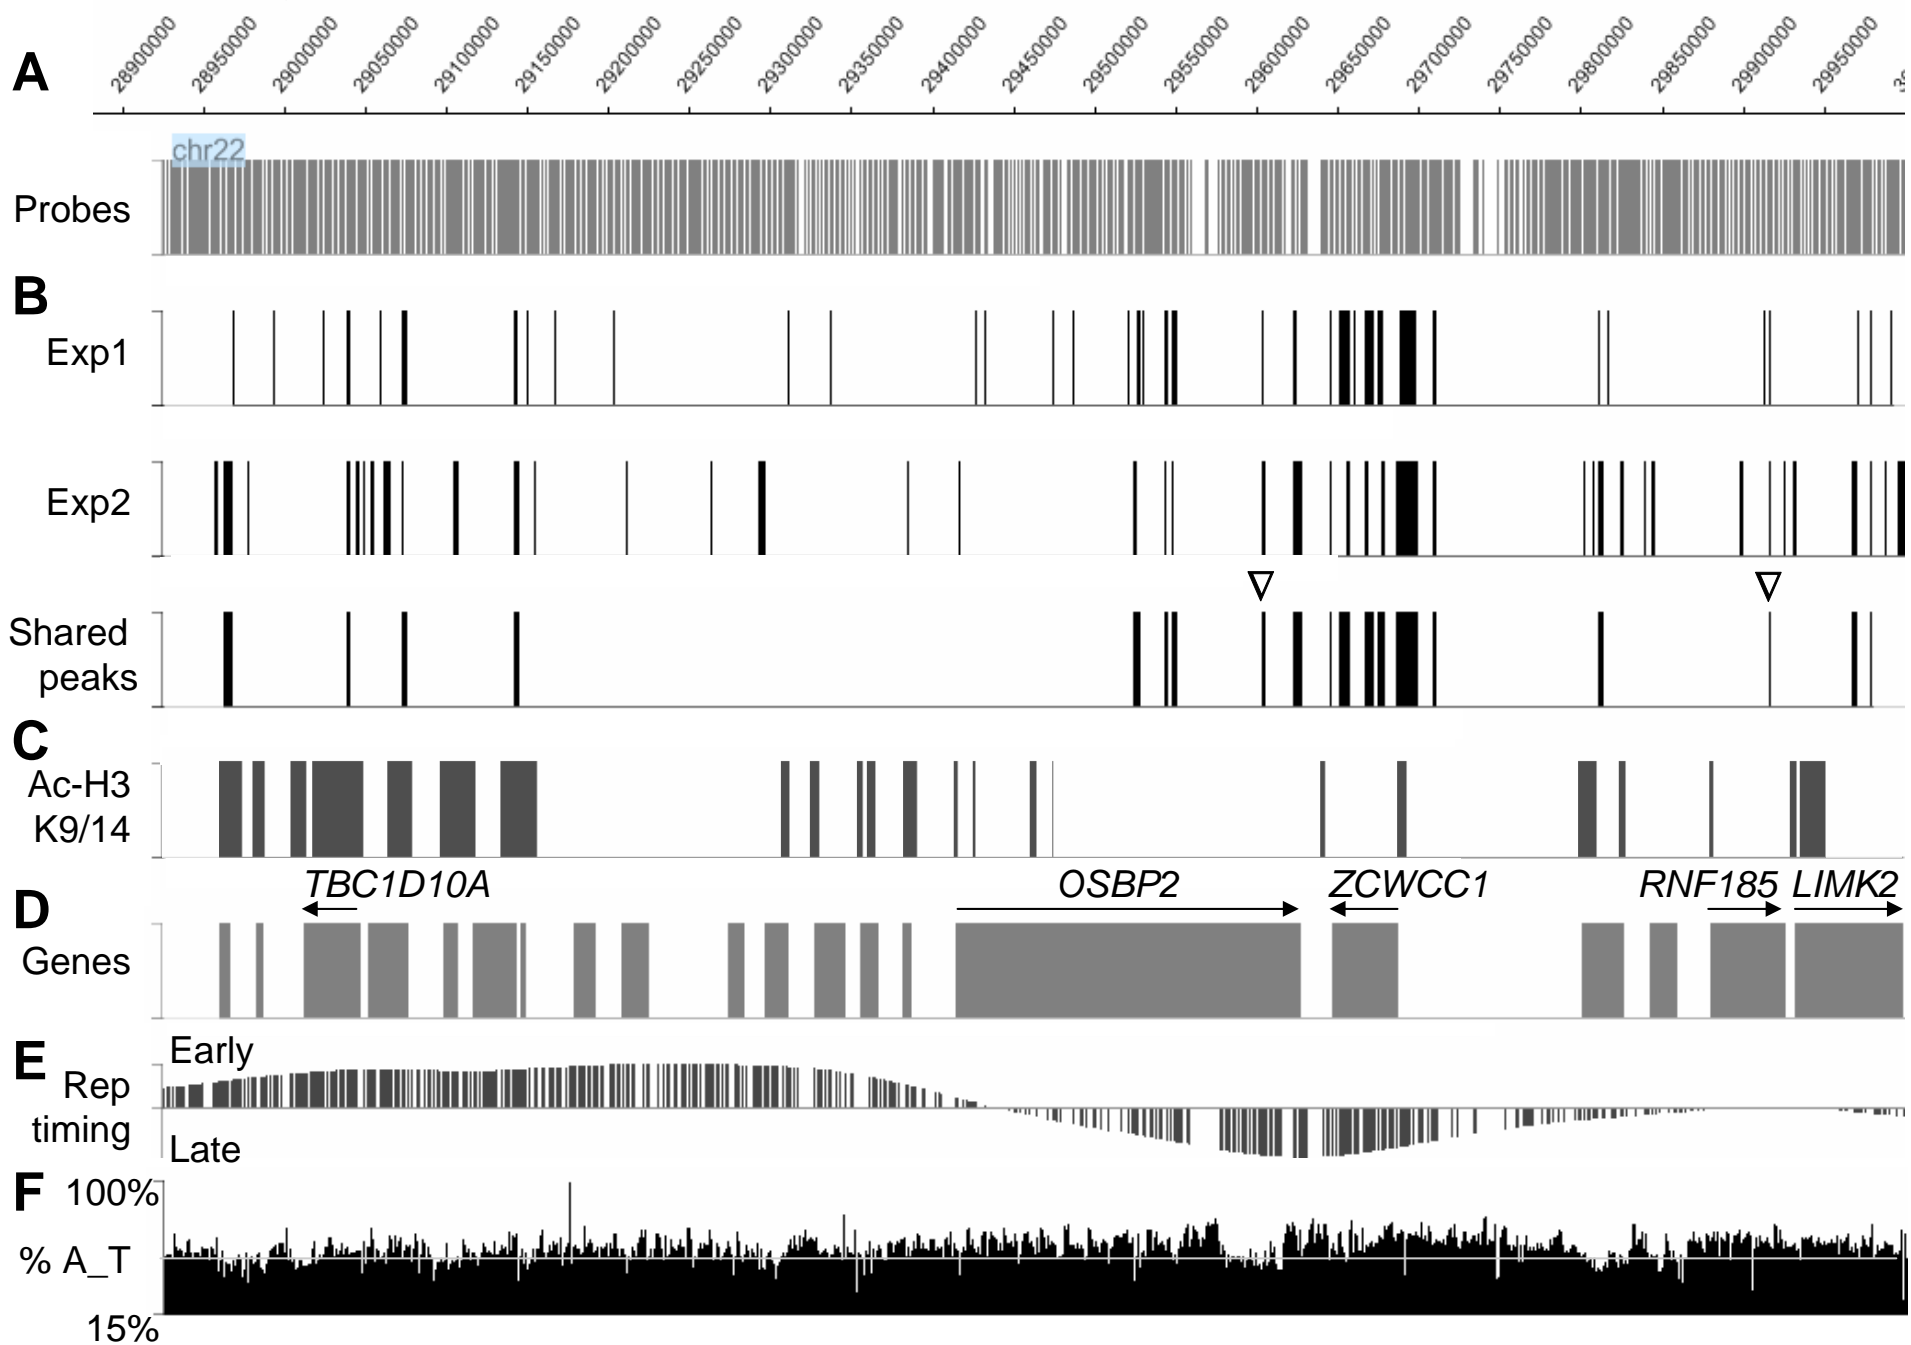

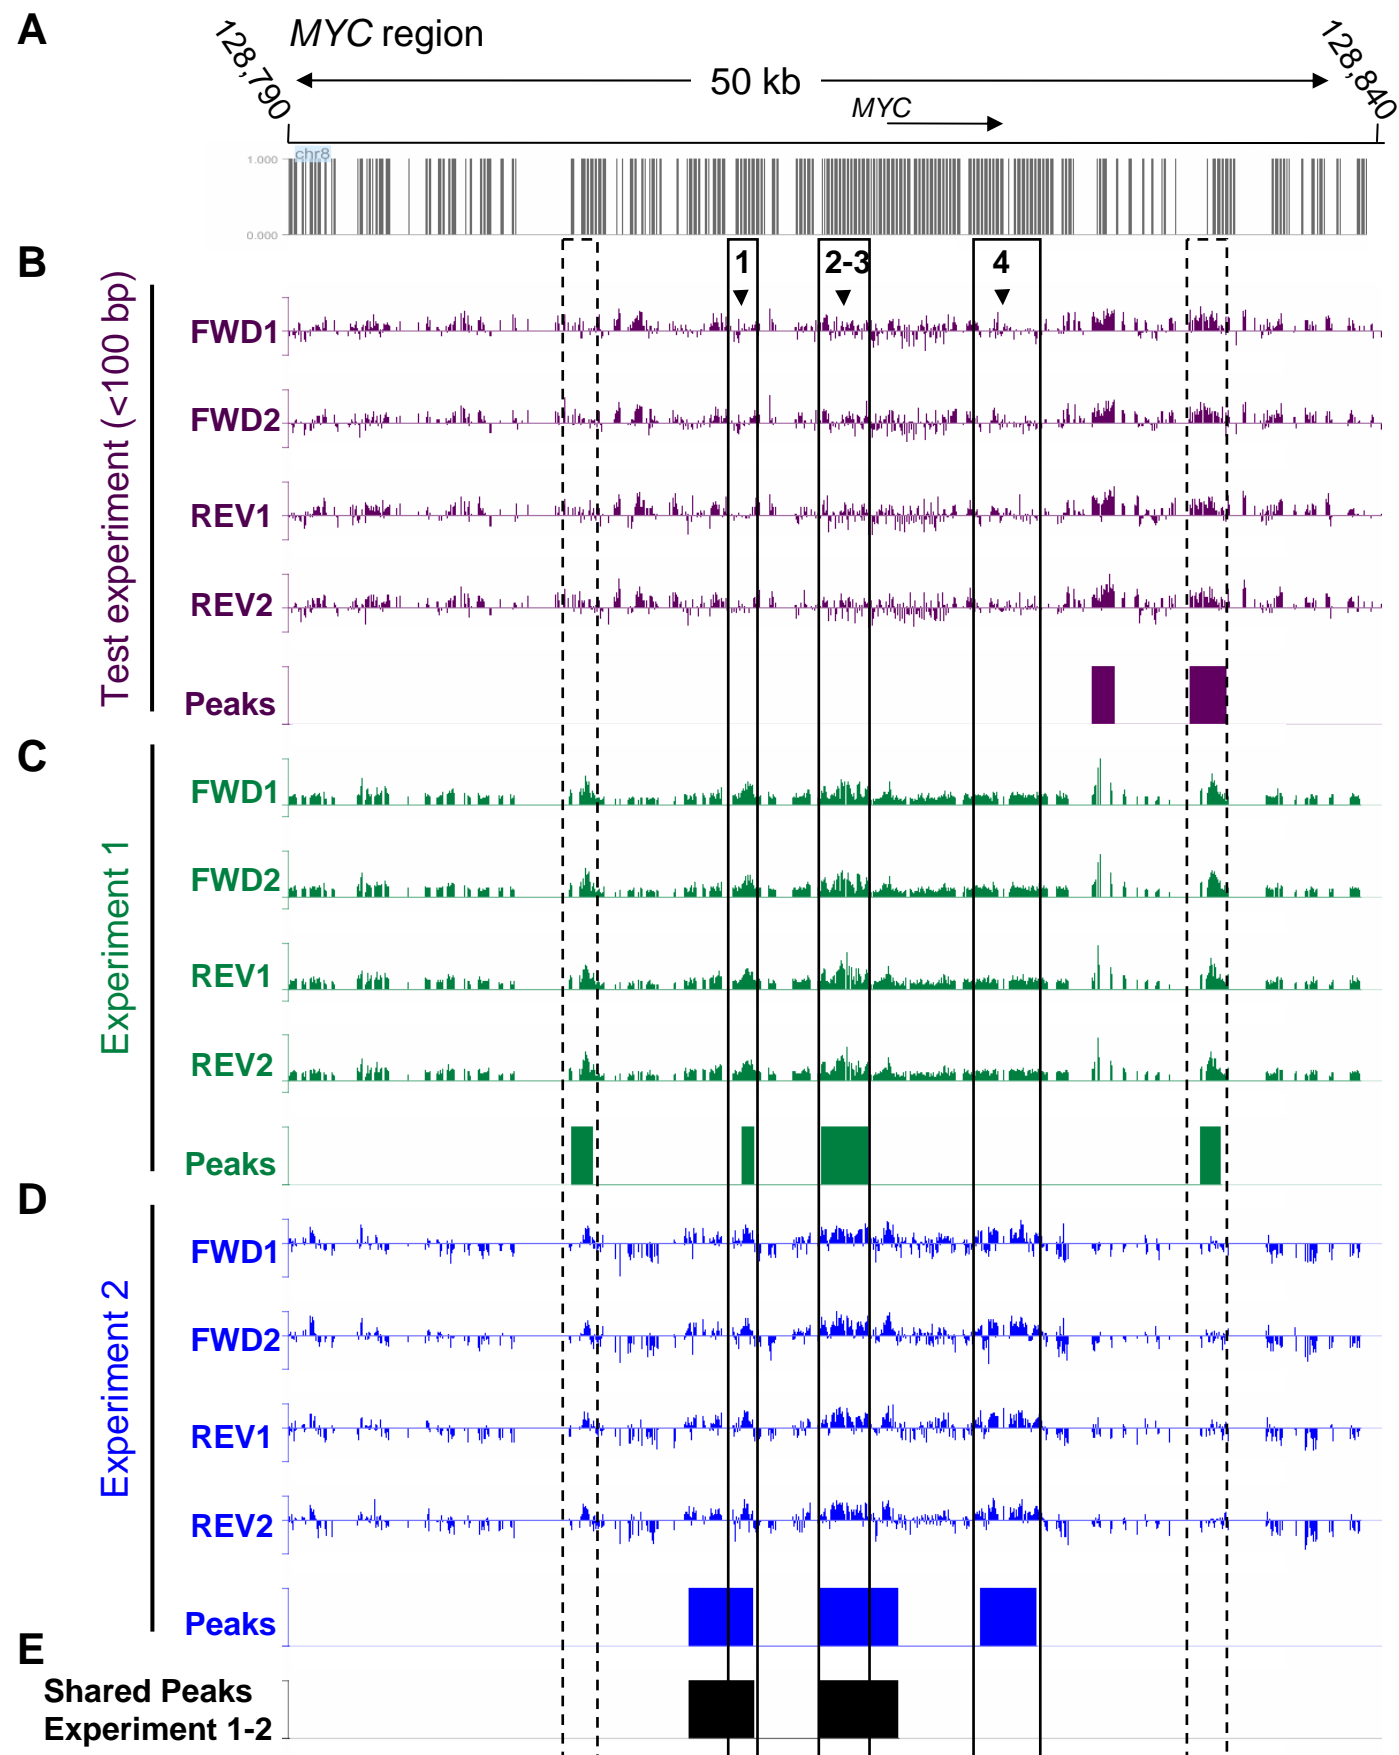

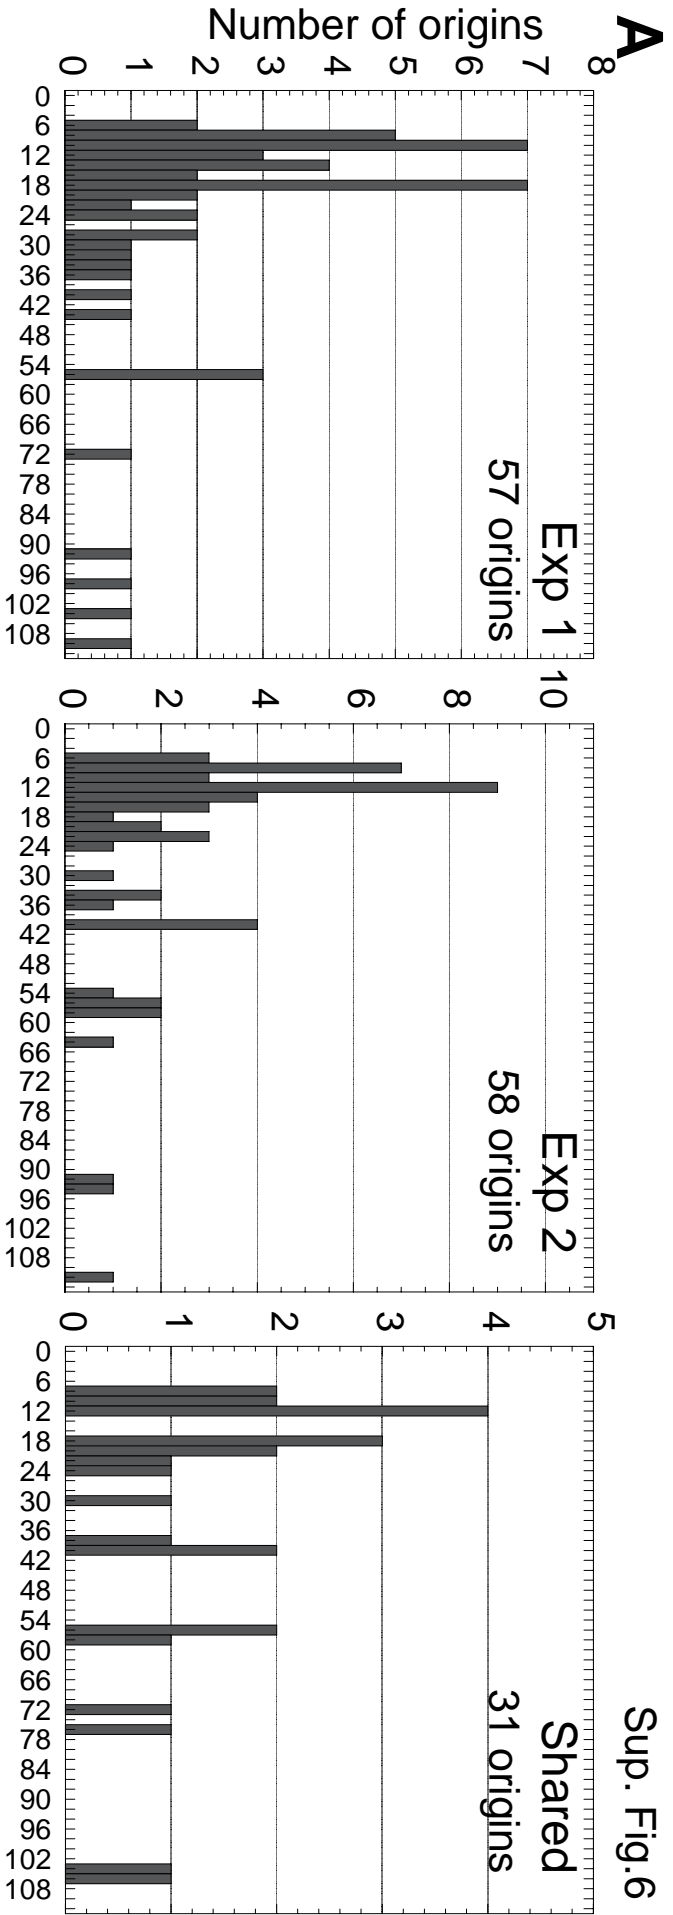

Distance between two origins (kb)

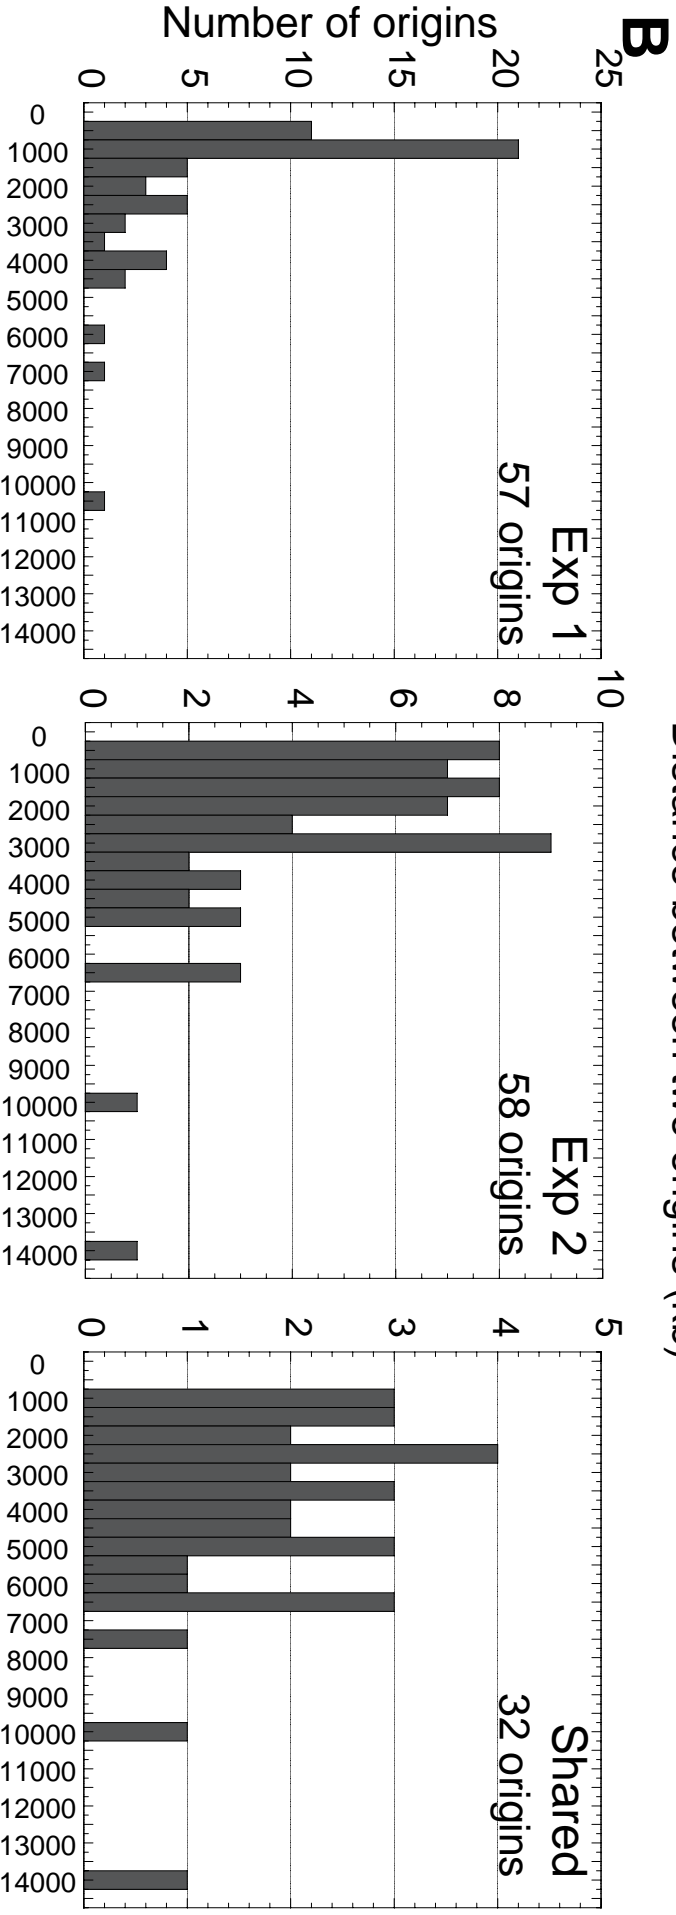

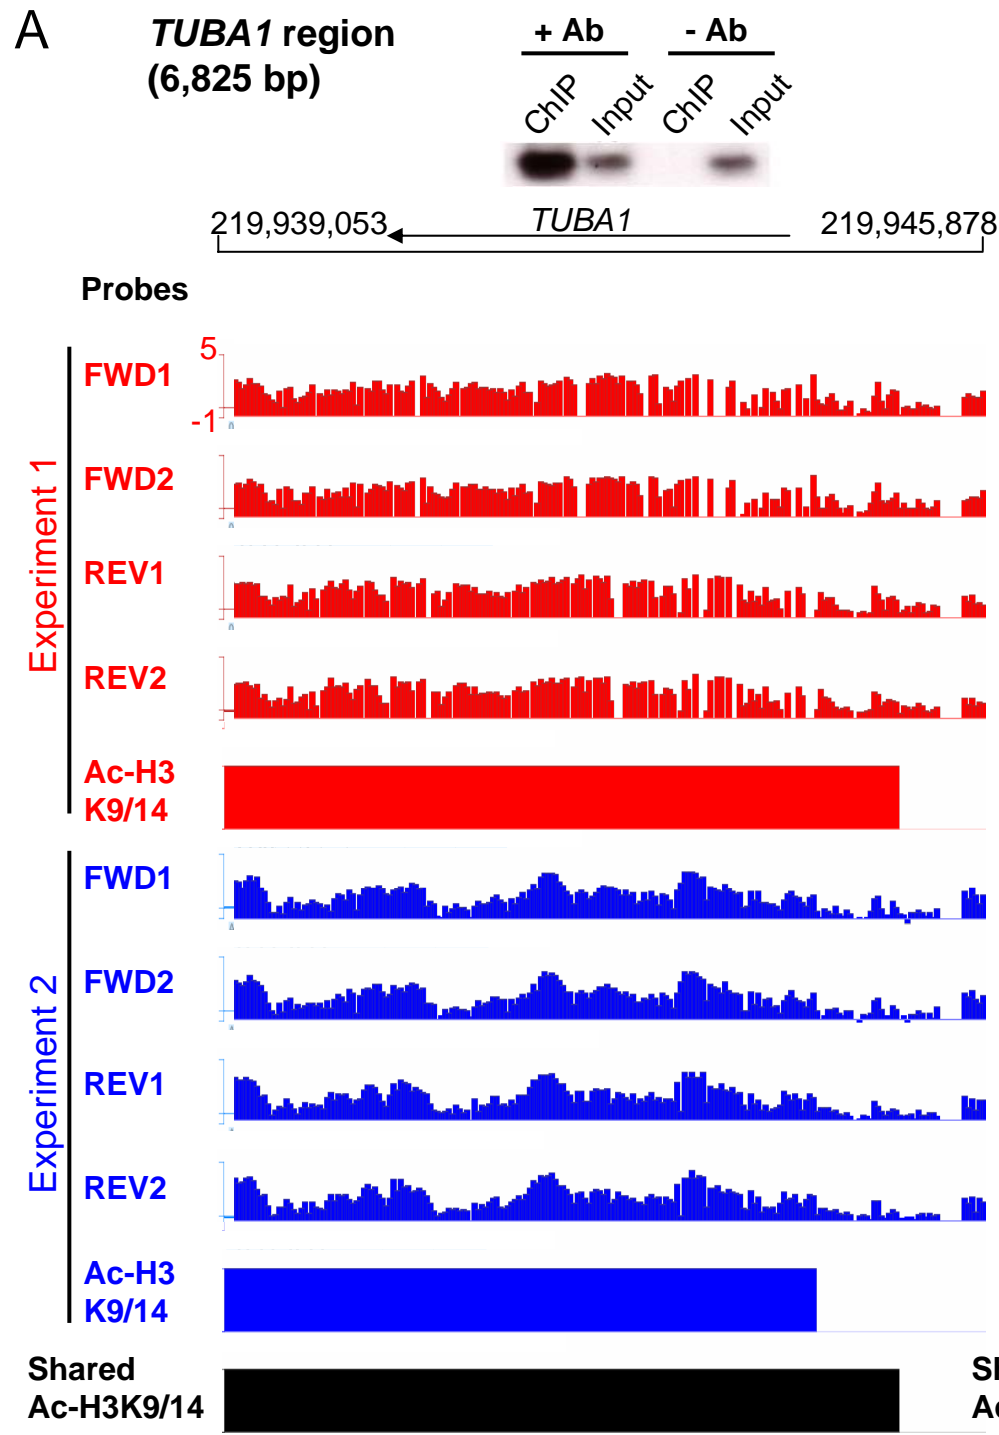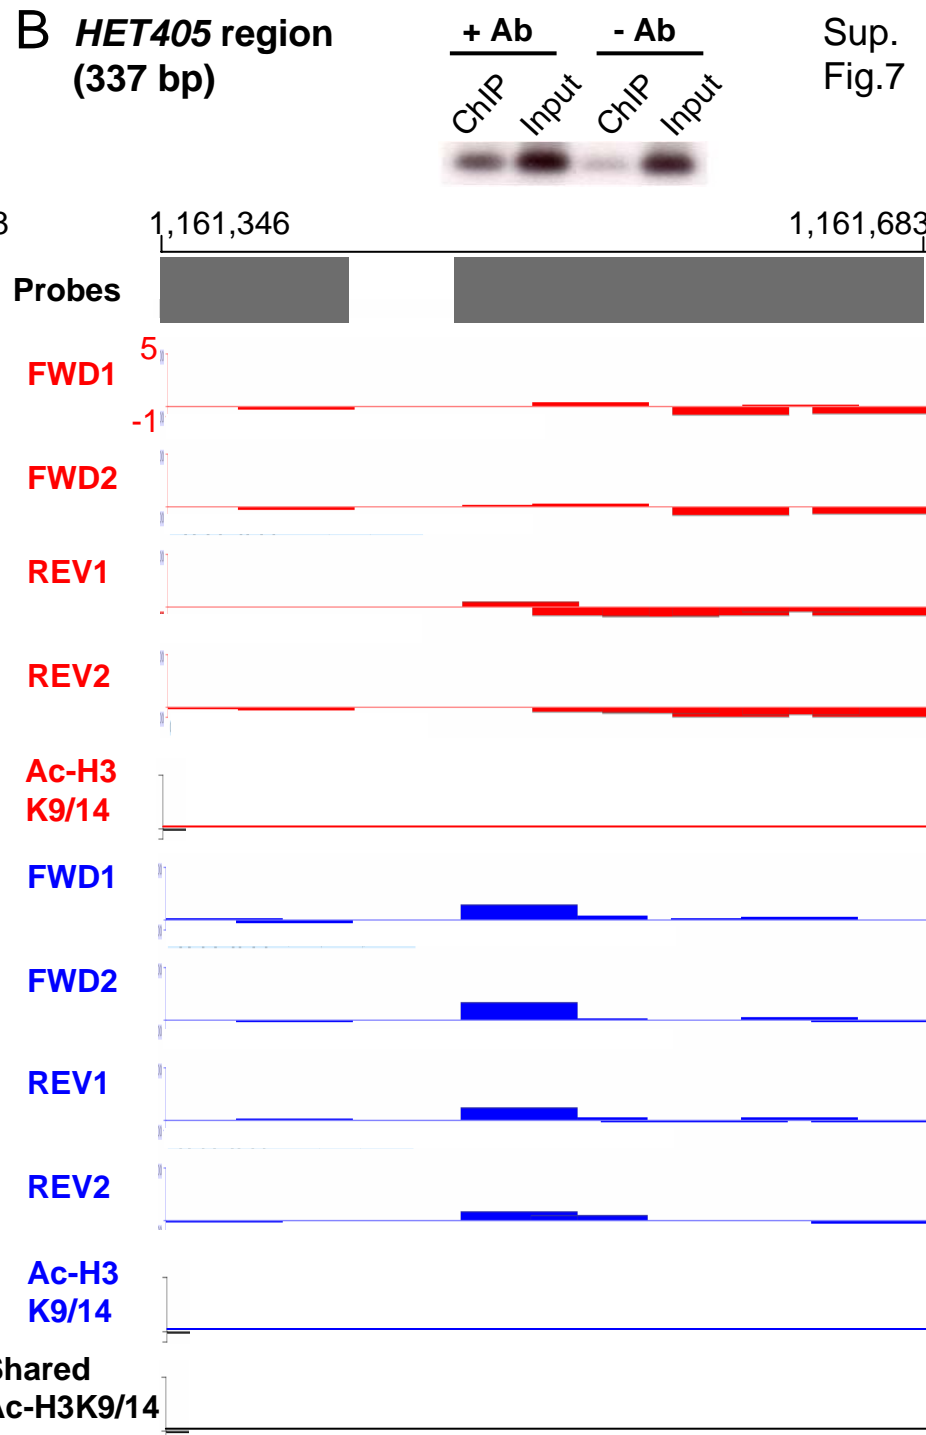

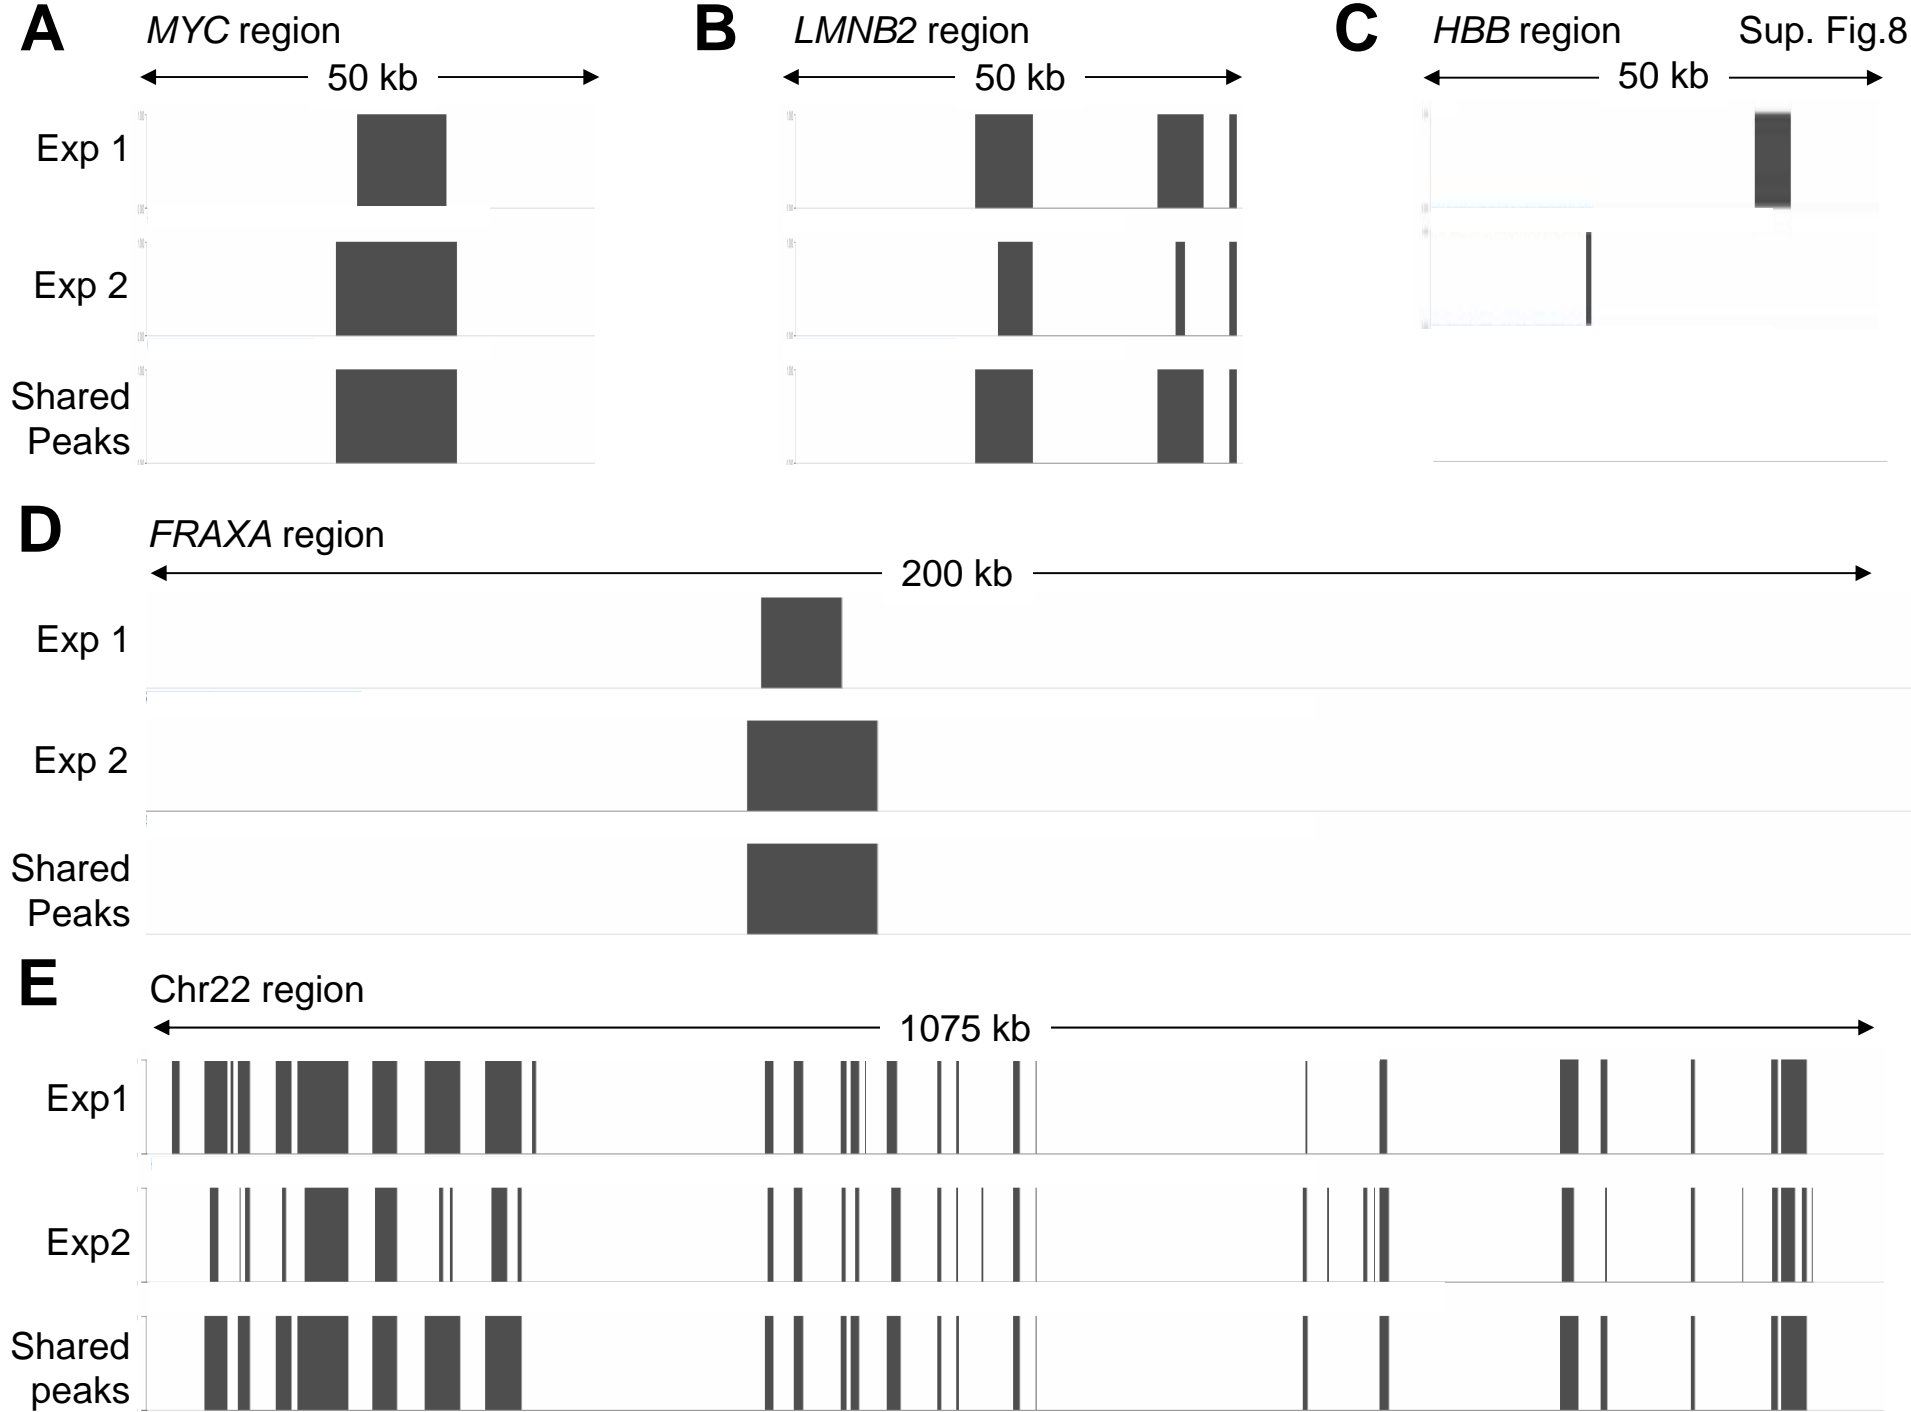



## Supplementary Figure Legends

**Supplementary Figure 1.** Zscore analysis of the microarray data. (A) Distribution of the Z score values obtained for the forward (FWD, in black) and reverse (REV, in grey) duplicated probe sets for the chr22 region. Less than 1% of the FWD and REV probes had a Z score  $\geq 4$ . (B) The percentage of data points excluded from the analysis for the FWD (black) and REV (grey) duplicated probe sets when using a cut-off of 3 for the Z score. Of note,  $\sim 88\%$  of the Z score values were below 1 (C) (1) Chromosome coordinates along the 50 kb *MYC* region represented on the array. (2) Example of the microarray results for the *MYC* region before the Z score analysis, and (3) after removing all data points with a Z score  $> 3$ . (4) Location of the data points removed. In panel 2, the arrowheads mark the location of two known origins in the *MYC* region. The different programs developed in this study for Z score transformation as well as for the subsequent analyses are available upon request.

**Supplemental Figure 2.** Distribution of all of the peaks for experiments 1 and 2 with an  $FPR \leq 10\%$  present in one (light gray), two (medium gray), three (dark grey), or four (black) of the data sets, for each percentage of qualifying probes (40%-100%) within the 625 nt sliding window used in the analysis. The percentage of peaks found in four of the data sets is indicated above each black bar. The cumulative percentage of peaks present in both three and four of the data sets, which we considered as potential origins, is given in parenthesis. Of note, more than 90% of the putative origins were found when 40% was used as the cut-off for the number of qualifying probes. The remaining 10% were only observed with an  $FPR \leq 10\%$  at a higher cut-off. As expected, the total number of peaks, as well as the number of peaks found in at least three data sets, decreased with the increasing cut-off value. To examine the impact of the density of probes on the feasibility of mapping origins, we decreased the number of probes on our array

*in silico* from a density of 30 nt from the start of one probe to the start of the next probe, to 120 nt by increments of 30 nt, and applied the peak finding method. This analysis revealed that the number of known origins that were not detected increased with decreasing density of probes (data not shown).

**Supplementary Figure 3.** Location of the putative origins for the four data sets for the *MYC* region. (A) The upper panel shows the chromosome coordinates, as well as the location of the probes present on the microarray. (B) Each track (FWD1, FWD2, REV1, and REV2) displays the location of the origin peaks found in experiment 1, using a cut-off of 40% of qualifying probes within the sliding window, for each of the data sets after applying the “2 kb-rule” merging method. (C) The track indicates the location of the origin peaks that are shared by the four data sets.

**Supplemental Figure 4.** Location of origins, chromatin acetylation peaks and genes, replication timing and AT content maps for the chr22 region. (A) Chromosome coordinates and location of the probes present on the microarray. (B) location of origins identified in the two independent experiments 1 and 2, and shaded origins. (C) location of the acetylated chromatin loci (histone H3 K9/14) shared between two independent ChIP experiments. (D) Location of the annotated genes. (E) Timing of replication analysis (Early vs. Late replication) using microarray analysis (White et al., 2004). (F) Percentage of chromosomal AT content. In panel E, the  $\log_2$  ratio of (early/late newly-replicated DNA hybridization signals) is plotted on the y axis. In panel F, the AT content is plotted as a 500 bp-sliding window along the region, and 50% AT content is indicated by a horizontal white bar. The open arrowheads in (B) indicate the putative origins tested by real-time PCR analysis.

**Supplemental Figure 5.** Specificity of the high-throughput origin mapping method. (A) The upper panel indicates the chromosome coordinates, and the location of the probes for the *MYC* region. The microarray results (FWD1, FWD2, REV1, and REV2,  $Z \text{ score} \leq 3$ ) as well as the origin peaks detected are shown for the following three experiments: (B) a test experiment (purple) using nascent strand highly-enriched for Okazaki fragments (smallest fragments <100 bp), (C and D) two independent nascent strand isolations using larger nascent strand DNAs (300-1000 bp). Of note, the nascent strand population used in experiment 2 (blue) was slightly larger in size than the one used in experiment 1 (green). (E) The last track (black) indicates the positions of the origins shared between the two independent experiments 1 and 2. The left-most dashed line rectangle indicates the location of an origin found in experiment 1 only; based on the microarray results, this origin may be a false-negative origin in experiment 2. The right-most dashed line rectangle indicates the position of a peak detected in the test experiment and the experiment 1, but not in experiment 2. This result suggests that this origin is likely a false-positive origin in the experiment 1.

**Supplemental Figure 6.** (A) Distribution of the average distance between adjacent origins (center-to-center) for all five regions combined, for the two independent experiments 1 and 2 and the shared origins. The very large inter-origin distance (377 kb) on chr22 was not plotted on the graph for the shared peaks. In summary, 86% and 84% of the shared origins of experiment 1 and 2 respectively were  $\leq 50$  kb apart. (B) Distribution of the size of the origins from all five regions combined, for the two independent experiments 1 and 2, and the shared origins. The total number of origins analyzed is indicated in each graph.

**Supplemental Figure 7.** Specificity of the high-throughput chromatin acetylation mapping method. (A) The hyperacetylated region, *TUBA1*, and (B) the hypoacetylated region, *HET405*

were used as positive and negative controls, respectively, for our ChIP-on chip experiments. The specificity of the ChIP of Ac-H3 K9/14 verified by PCR, the chromosome coordinates, the location of the arrayed probes, the results (FWD1, FWD2, REV1, and REV2,  $Z$  score  $\leq 3$ ) of the microarray data, the shared Ac-H3 K9/14 peaks for each independent ChIP experiment (1 and 2), and the shared Ac-H3 K9/14 peaks between the two independent ChIP experiments 1 and 2 are shown for each region. The control PCR was illustrated at the top performed on an equal volume of ChIP DNA and input DNA to amplify *HET405* (Forward primer: 5'-CAGAACTGTTTGTGATGTG-3', reverse primer: 5'-TGTAGTATCTGCAAGAGGAC-3', 35 cycles at 60 °C) and *TUBA1* (Forward primer: 5'-CAGATGCCCGAGTGACAAGAC-3', reverse primer: 5'-AGTGTGAGAGAAACCCAGAC-3', 35 cycles at 60 °C). PCR products were resolved on a 1% agarose gel and transferred to the Hybond<sup>TM</sup>-N+ membrane. Southern blot probes were produced by PCR amplification of the *TUBA1* and *HET405* sequences from genomic DNA, and subsequent gel purification and radioactive labeling. Band intensity was quantified by phosphor-imaging. The acetylation ratio was calculated as  $\text{ChIP Intensity}/(\text{Input Intensity} \times 100)$  since the input DNA was extracted from 1% of the starting lysate.

**Supplemental Figure 8.** Location of the Ac-H3 K9/14 peaks within the (A) *MYC*, (B) *LMNB2*, (C) *HBB*, (D) *FRAXA*, and (E) Chr22 regions for the independent ChIP experiments 1 and 2, as well as the Ac-H3 K9/14 peaks that are shared by both experiments.

**Supplementary Table 1.** Chromosomal Regions Covered on the Microarray Platform

| <b>Region</b> | <b>Chromosome</b> | <b>Start (bp)</b> | <b>Stop (bp)</b> | <b>Size (bp)</b> |
|---------------|-------------------|-------------------|------------------|------------------|
| <i>MYC</i>    | 8                 | 128,790,835       | 128,840,835      | 50,000           |
| <i>LMNB2</i>  | 19                | 2,354,000         | 2,404,000        | 50,000           |
| <i>HBB</i>    | 11                | 5,183,000         | 5,233,000        | 50,000           |
| <i>FRAXA</i>  | X                 | 146,630,000       | 146,830,000      | 200,000          |
| <b>Chr 22</b> | 22                | 28,925,000        | 30,000,000       | 1,075,000        |
| <i>TUBA1</i>  | 2                 | 219,939,053       | 219,945,878      | 6,825            |
| <i>HET405</i> | 9                 | 1,161,346         | 1,161,683        | 337              |

**Supplementary Table 2.** Origin Identified by Microarray Analysis

| <b>Region</b>                | <b>Origins</b>               |           | <b>Origin start (bp)</b>     | <b>Origin end (bp)</b> |             |
|------------------------------|------------------------------|-----------|------------------------------|------------------------|-------------|
| <b>MYC</b>                   | Found in Experiment 1        |           | 128,803,756                  | 128,804,765            |             |
|                              |                              |           | 128,811,558                  | 128,812,118            |             |
|                              |                              |           | 128,815,174                  | 128,817,331            |             |
|                              |                              |           | 128,832,515                  | 128,833,477            |             |
|                              | Found in Experiment 2        |           | 128,809,111                  | 128,812,058            |             |
|                              |                              |           | 128,815,102                  | 128,818,705            |             |
|                              |                              |           | 128,822,431                  | 128,825,027            |             |
|                              | Shared by Experiment 1 and 2 |           | 128,809,111                  | 128,812,118            |             |
|                              |                              |           | 128,815,102                  | 128,818,705            |             |
|                              | Previously mapped origins    |           | STS-EP11 ori<br>(700-850 bp) | 128,810,453            | 128,810,768 |
| MYC ori                      |                              |           | 128,815,936                  | 128,816,304            |             |
| STS-I ori<br>(615-850 bp)    |                              |           | 128,818,950                  | 128,819,106            |             |
| STS-J-M ori<br>(615-1500 bp) |                              |           | 128,821,862                  | 128,822,989            |             |
| <b>LMNB2</b>                 | Found in Experiment 1        |           | 2,361,076                    | 2,365,214              |             |
|                              |                              |           | 2,379,134                    | 2,380,114              |             |
|                              |                              |           | 2,394,621                    | 2,397,191              |             |
|                              | Found in Experiment 2        |           | 2,374,564                    | 2,384,805              |             |
|                              |                              |           | 2,394,471                    | 2,395,121              |             |
|                              | Shared by Experiment 1 and 2 |           | 2,374,564                    | 2,384,805              |             |
|                              |                              |           | 2,394,471                    | 2,397,191              |             |
| Previously mapped origin     | LMNB2 ori                    | 2,379,085 | 2,379,352                    |                        |             |
| <b>HBB</b>                   | Found in Experiment 1        |           | 5,209,792                    | 5,210,818              |             |
|                              |                              |           | 5,219,144                    | 5,223,314              |             |
|                              | Found in Experiment 2        |           | 5,184,279                    | 5,187,132              |             |
|                              |                              |           | 5,202,479                    | 5,206,232              |             |
|                              |                              |           | 5,210,198                    | 5,211,028              |             |
|                              |                              |           | 5,217,893                    | 5,221,058              |             |
|                              | Shared by Experiment 1 and 2 |           | 5,209,792                    | 5,211,028              |             |
|                              |                              |           | 5,217,893                    | 5,223,314              |             |
|                              | Previously mapped origins    |           | HBB ori 1                    | 5,205,800              | 5,210,392   |
|                              |                              |           | HBB ori 2<br>(<650-850 bp)   | 5,225,895              | 5,226,050   |
| <b>FRAXA</b>                 | Found in Experiment 1        |           | 146,633,555                  | 146,636,361            |             |
|                              |                              |           | 146,643,636                  | 146,646,229            |             |

|            |                              |                       |             |             |
|------------|------------------------------|-----------------------|-------------|-------------|
|            |                              | 146,696,368           | 146,700,876 |             |
|            |                              | 146,707,372           | 146,708,160 |             |
|            |                              | 146,717,549           | 146,719,069 |             |
|            |                              | 146,728,517           | 146,731,718 |             |
|            |                              | 146,743,855           | 146,747,268 |             |
|            |                              | 146,751,581           | 146,753,686 |             |
|            |                              | 146,780,483           | 146,781,523 |             |
|            |                              | 146,811,457           | 146,812,372 |             |
|            |                              | 146,816,470           | 146,819,096 |             |
|            | Found in Experiment 2        | 146,643,636           | 146,647,759 |             |
|            |                              | 146,696,368           | 146,702,766 |             |
|            |                              | 146,706,006           | 146,706,896 |             |
|            |                              | 146,714,362           | 146,719,459 |             |
|            |                              | 146,740,713           | 146,747,268 |             |
|            |                              | 146,780,483           | 146,782,891 |             |
|            |                              | 146,816,470           | 146,820,884 |             |
|            | Shared by Experiment 1 and 2 | 146,643,636           | 146,647,759 |             |
|            |                              | 146,696,368           | 146,702,766 |             |
|            |                              | 146,706,006           | 146,708,160 |             |
|            |                              | 146,714,362           | 146,719,459 |             |
|            |                              | 146,740,713           | 146,747,268 |             |
|            |                              | 146,780,483           | 146,782,891 |             |
|            |                              | 146,816,470           | 146,820,884 |             |
|            | Previously mapped origin     | <i>FMRI</i> ori       | 146,698,529 | 146,699,029 |
|            | <b>Chr22</b>                 | Found in Experiment 1 | 28,968,247  | 28,969,137  |
|            |                              |                       | 28,994,037  | 28,994,976  |
|            |                              |                       | 29,024,407  | 29,024,995  |
|            |                              |                       | 29,039,147  | 29,040,692  |
| 29,059,018 |                              |                       | 29,059,818  |             |
| 29,072,440 |                              |                       | 29,076,714  |             |
| 29,142,437 |                              |                       | 29,143,897  |             |
| 29,150,302 |                              |                       | 29,150,986  |             |
| 29,166,462 |                              |                       | 29,166,999  |             |
| 29,203,620 |                              |                       | 29,204,447  |             |
| 29,311,351 |                              |                       | 29,312,264  |             |
| 29,337,477 |                              |                       | 29,338,217  |             |
| 29,426,404 |                              |                       | 29,427,354  |             |
| 29,432,393 |                              |                       | 29,433,043  |             |
| 29,473,704 |                              |                       | 29,474,894  |             |
| 29,486,811 |                              |                       | 29,487,581  |             |
| 29,520,964 |                              |                       | 29,521,944  |             |

|  |                       |            |            |
|--|-----------------------|------------|------------|
|  |                       | 29,525,829 | 29,528,037 |
|  |                       | 29,530,187 | 29,531,047 |
|  |                       | 29,543,826 | 29,545,057 |
|  |                       | 29,547,524 | 29,551,472 |
|  |                       | 29,603,147 | 29,603,767 |
|  |                       | 29,622,826 | 29,625,126 |
|  |                       | 29,645,234 | 29,645,884 |
|  |                       | 29,650,788 | 29,657,772 |
|  |                       | 29,660,345 | 29,661,603 |
|  |                       | 29,666,419 | 29,672,302 |
|  |                       | 29,674,829 | 29,678,687 |
|  |                       | 29,688,494 | 29,698,952 |
|  |                       | 29,708,952 | 29,711,233 |
|  |                       | 29,811,125 | 29,811,805 |
|  |                       | 29,816,089 | 29,817,039 |
|  |                       | 29,912,611 | 29,913,356 |
|  |                       | 29,916,302 | 29,917,072 |
|  |                       | 29,970,575 | 29,971,015 |
|  |                       | 29,978,784 | 29,979,581 |
|  |                       | 29,990,586 | 29,992,034 |
|  | Found in Experiment 2 | 28,957,459 | 28,959,388 |
|  |                       | 28,962,630 | 28,969,047 |
|  |                       | 28,977,343 | 28,978,040 |
|  |                       | 29,039,387 | 29,040,752 |
|  |                       | 29,044,824 | 29,046,432 |
|  |                       | 29,048,888 | 29,049,598 |
|  |                       | 29,053,497 | 29,055,863 |
|  |                       | 29,061,887 | 29,065,916 |
|  |                       | 29,073,129 | 29,073,749 |
|  |                       | 29,104,370 | 29,107,594 |
|  |                       | 29,142,437 | 29,145,612 |
|  |                       | 29,155,004 | 29,155,683 |
|  |                       | 29,211,414 | 29,212,124 |
|  |                       | 29,263,324 | 29,264,544 |
|  |                       | 29,292,486 | 29,297,403 |
|  |                       | 29,384,317 | 29,385,760 |
|  |                       | 29,415,895 | 29,416,875 |
|  |                       | 29,524,374 | 29,526,584 |
|  |                       | 29,543,406 | 29,545,027 |
|  |                       | 29,547,524 | 29,548,384 |
|  |                       | 29,603,147 | 29,605,216 |
|  |                       | 29,623,006 | 29,627,974 |



|  |                              |            |            |
|--|------------------------------|------------|------------|
|  |                              | 29,645,534 | 29,646,154 |
|  |                              | 29,655,172 | 29,658,162 |
|  |                              | 29,666,419 | 29,669,523 |
|  |                              | 29,676,987 | 29,679,764 |
|  |                              | 29,685,712 | 29,699,547 |
|  |                              | 29,709,372 | 29,711,353 |
|  |                              | 29,802,008 | 29,802,996 |
|  |                              | 29,807,018 | 29,808,988 |
|  |                              | 29,811,155 | 29,813,830 |
|  |                              | 29,823,896 | 29,826,960 |
|  |                              | 29,839,028 | 29,840,388 |
|  |                              | 29,843,726 | 29,845,474 |
|  |                              | 29,897,875 | 29,900,021 |
|  |                              | 29,916,302 | 29,917,582 |
|  |                              | 29,925,441 | 29,926,806 |
|  |                              | 29,930,773 | 29,932,712 |
|  |                              | 29,967,694 | 29,971,195 |
|  |                              | 29,978,904 | 29,979,761 |
|  |                              | 29,987,590 | 29,988,300 |
|  |                              | 29,995,421 | 29,999,992 |
|  |                              | 28,962,630 | 28,969,137 |
|  |                              | 29,039,147 | 29,040,752 |
|  |                              | 29,072,440 | 29,076,714 |
|  |                              | 29,142,437 | 29,145,612 |
|  |                              | 29,524,374 | 29,528,037 |
|  |                              | 29,543,406 | 29,545,057 |
|  |                              | 29,547,524 | 29,551,472 |
|  |                              | 29,603,147 | 29,605,216 |
|  |                              | 29,622,826 | 29,627,974 |
|  | Shared by Experiment 1 and 2 | 29,645,234 | 29,646,154 |
|  |                              | 29,650,788 | 29,658,162 |
|  |                              | 29,666,419 | 29,672,302 |
|  |                              | 29,674,829 | 29,679,764 |
|  |                              | 29,685,712 | 29,699,547 |
|  |                              | 29,708,952 | 29,711,353 |
|  |                              | 29,811,125 | 29,813,830 |
|  |                              | 29,916,302 | 29,917,582 |
|  |                              | 29,967,694 | 29,971,195 |
|  |                              | 29,978,784 | 29,979,761 |

**Supplementary Table 3.** Sequence, Chromosomal Coordinates and Amplification Conditions of the Real-Time PCR Primer Sets

| Region       | Primer         | Sequence                | Start (bp)  | End (bp)    | Annealing Temp (°C) | MgCl <sub>2</sub> (mM) |
|--------------|----------------|-------------------------|-------------|-------------|---------------------|------------------------|
| <i>MYC</i>   | -6.8p forward  | gagttggcaacccttgatgt    | 128,808,885 | 128,808,904 | 58                  | 2                      |
|              | -6.8p reverse  | gtaggatttcccgcctttc     | 128,809,139 | 128,809,158 |                     |                        |
|              | -0.9p forward  | cagcagtttcagaggcaaag    | 128,814,762 | 128,814,781 | 61                  | 3                      |
|              | -0.9p reverse  | cagcagaaggtgatgggtat    | 128,815,065 | 128,815,084 |                     |                        |
|              | orip forward   | tacagactggcagagagcag    | 128,816,612 | 128,816,631 | 59/60               | 2                      |
|              | orip reverse   | atgtatgcacagctatctgg    | 128,816,805 | 128,816,824 |                     |                        |
|              | +7p forward    | ggttctaagatgcttctctgg   | 128,823,018 | 128,823,037 | 59                  | 2                      |
|              | +7p reverse    | tggttgtgaaggcagcagaa    | 128,823,287 | 128,823,306 |                     |                        |
| <i>LMNB2</i> | -5.9p forward  | gctgcgctcaggttaagaag    | 2,372,931   | 2,372,950   | 68                  | 2                      |
|              | -5.9p reverse  | gtgctcacggcagataaggt    | 2,373,161   | 2,373,180   |                     |                        |
|              | orip forward   | gcgtcacagcacaacctgc     | 2,379,333   | 2,379,352   | 62                  | 3                      |
|              | orip reverse   | gaggcagaacctaaaatcaa    | 2,379,153   | 2,379,173   |                     |                        |
|              | +3.6p forward  | gttaacagtcaggcgcattggcc | 2,383,142   | 2,383,164   | 66                  | 3                      |
|              | +3.6p reverse  | ccatcagggtcacctctggttcc | 2,382,924   | 2,382,946   |                     |                        |
|              | +5.5p forward  | ctcctcgatgctgacgctac    | 2,384,872   | 2,384,891   | 68                  | 3                      |
|              | +5.5p reverse  | taccagtcccaccttctctg    | 2,385,116   | 2,385,135   |                     |                        |
| <i>FRAXA</i> | -7.7p forward  | ctgggcatggaagtcaagtt    | 146,688,379 | 146,688,398 | 63                  | 2                      |
|              | -7.7p reverse  | gagtgccagtttccaagctc    | 146,688,633 | 146,688,652 |                     |                        |
|              | -1.1p forward  | actgtaggggaggaggaga     | 146,695,034 | 146,695,053 | 65                  | 2                      |
|              | -1.1 reverse   | tcttttccatggctcaaacc    | 146,695,287 | 146,695,306 |                     |                        |
|              | orip_1 forward | acaacagcttacacttgag     | 146,697,411 | 146,697,430 | 62                  | 2                      |
|              | orip_1 reverse | ctaatagcactgagttggca    | 146,697,711 | 146,697,730 |                     |                        |
|              | orip_2 forward | gcgcgtctgtctttcgacc     | 146,698,804 | 146,698,823 | 64                  | 2                      |
|              | orip_2 reverse | ccctccaccggaagtgaaacc   | 146,699,009 | 146,699,029 |                     |                        |
|              | orip_3 forward | aggctctctttggcttctct    | 146,699,760 | 146,699,779 | 63                  | 2                      |
|              | orip_3 reverse | atggttttagacgctgaagc    | 146,700,045 | 146,700,064 |                     |                        |
|              | orip_4 forward | ttgggggtcaaccacattttt   | 146,702,529 | 146,702,548 | 58                  | 2                      |
|              | orip_4 reverse | cgatcccaatcttctcagga    | 146,702,742 | 146,702,761 |                     |                        |
|              | +1.5 forward   | gagcagtggttctctgttgg    | 146,704,269 | 146,704,288 | 68                  | 4                      |
|              | +1.5 reverse   | ctagcaactgggccaagag     | 146,704,450 | 146,704,469 |                     |                        |
|              | +4.9 forward   | aaacctgacaccacctcag     | 146,707,695 | 146,707,714 | 68                  | 3                      |
|              | +4.9 reverse   | ggcctctctccattccttct    | 146,707,920 | 146,707,939 |                     |                        |
| <i>OSPB2</i> | -2.1 forward   | gcaacaagggtatgtaggat    | 29,600,765  | 29,600,784  | 60                  | 3                      |
|              | -2.1 reverse   | tggtccaggctaggaaactg    | 29,600,991  | 29,601,010  |                     |                        |
|              | orip_1 forward | cagaatcagcaggagggttt    | 29,603,144  | 29,603,163  | 63                  | 2                      |
|              | orip_1 reverse | agagggaagatgaccagag     | 29,603,420  | 29,603,439  |                     |                        |
|              | orip_2 forward | gcagccagataggcaagaac    | 29,603,693  | 29,603,712  | 65                  | 2                      |

|               |                |                       |            |            |    |   |
|---------------|----------------|-----------------------|------------|------------|----|---|
|               | orip_2 reverse | tctcaaggctcagagtgcaa  | 29,603,957 | 29,603,976 |    |   |
|               | orip_3 forward | tagcccagaccttcaacacc  | 29,604,677 | 29,604,696 | 62 | 2 |
|               | orip_3 reverse | ctctgagcccacatcctctc  | 29,604,920 | 29,604,939 |    |   |
|               | +0.4p forward  | tgccacatcacctcctgata  | 29,605,623 | 29,605,642 | 60 | 2 |
|               | +0.4p reverse  | aacctctggatttgccttt   | 29,605,869 | 29,605,888 |    |   |
|               | +2.9p forward  | accctccaagagcttcatt   | 29,608,136 | 29,608,155 | 56 | 3 |
|               | +2.9p reverse  | ggacagctgggctcattaaa  | 29,608,378 | 29,608,397 |    |   |
| <b>RNF185</b> | -4.3p forward  | tgccatgatttggggttatt  | 29,911,800 | 29,911,819 | 56 | 3 |
|               | -4.3p reverse  | gtaggccaggacagtggaaa  | 29,912,007 | 29,912,026 |    |   |
|               | orip_1 forward | cttctccccttggatgtgaa  | 29,916,151 | 29,916,170 | 58 | 2 |
|               | orip_1 reverse | tggagcctctcctgctacat  | 29,916,389 | 29,916,408 |    |   |
|               | orip_2 forward | caggatctgggtgactttgt  | 29,916,460 | 29,916,479 | 63 | 3 |
|               | orip_2 reverse | agaagttagaggagcaggtg  | 29,916,745 | 29,916,764 |    |   |
|               | orip_3 forward | cacctgctcctctaacttct  | 29,916,745 | 29,916,764 | 63 | 2 |
|               | orip_3 reverse | aacagaggggtgggttgtcag | 29,917,107 | 29,917,126 |    |   |
|               | orip_4 forward | ctgacaaccaccctctgtt   | 29,917,107 | 29,917,126 | 62 | 2 |
|               | orip_4 reverse | cgaggaggggtcttctctct  | 29,917,474 | 29,917,493 |    |   |
|               | +1.1p forward  | tttggcaggttttccatgat  | 29,918,717 | 29,918,736 | 61 | 3 |
|               | +1.1p reverse  | cagttgggcaacaagagtga  | 29,918,968 | 29,918,987 |    |   |
|               | +2.4p forward  | ctggccttgttgaccaaagt  | 29,920,006 | 29,920,025 | 60 | 3 |
|               | +2.4p reverse  | cttgggaaggtgcaattgtt  | 29,920,205 | 29,920,224 |    |   |

The FRAXA orip\_2 primer set corresponds to the FraX-1d primer set used by Gray et al (2007). The numbers associated with the primer sets adjacent to the origins correspond to the distance in kb from the boundary of the closest origin. Two to four sets of primers (orip\_1 to \_4p) were used to verify each of the three novel origins.
